# Supplementary figures and images for: Effect of Exogenous Melatonin on the Development of Mice Ovarian Follicles and Follicular Angiogenesis
Source: MDPI journal article supplement (doi:10.3390/ijms222011262), 2021-10-19

Figure S1

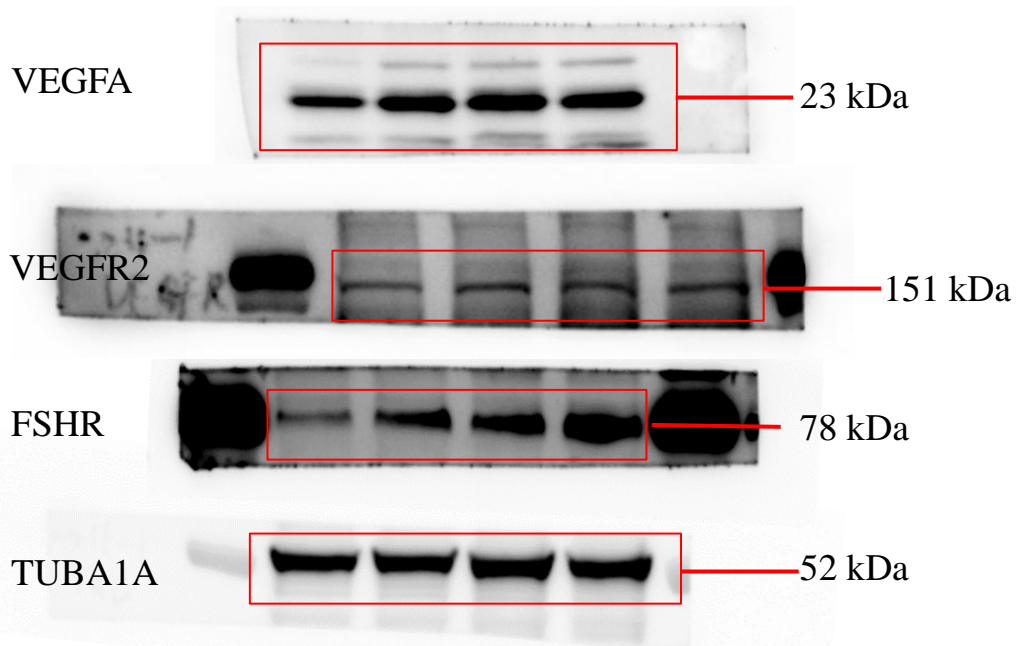

Figure S2

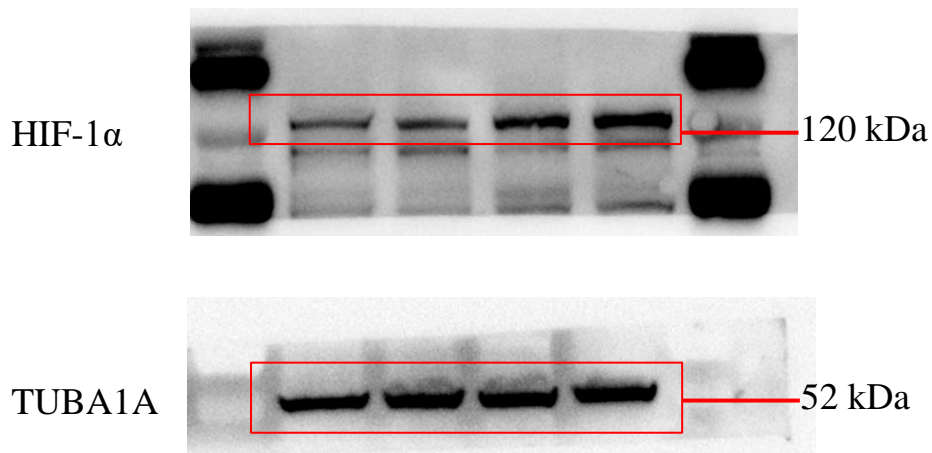

Figure S3

Nrf2

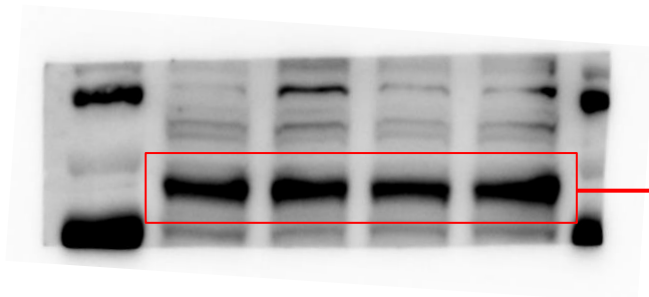

97-100 kDa

Keap1

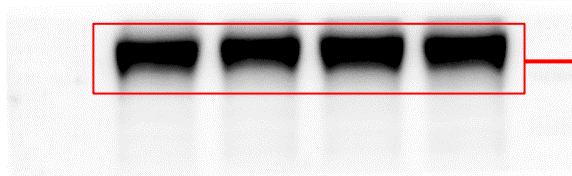

60-64 kDa

HO-1

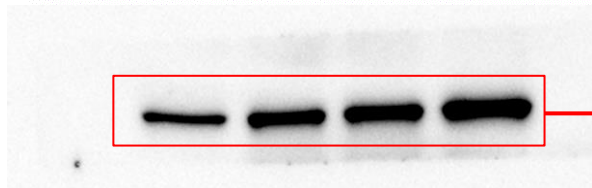

28 kDa

TUBA1A

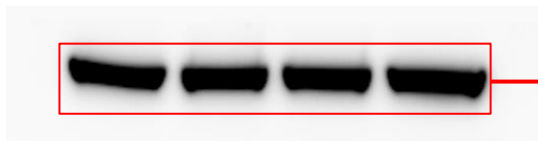

52 kDa

Supplement: s1 [file s1]
